# Supplementary material for: Development and validation of a deep learning algorithm detecting 10 common abnormalities on chest radiographs
Source: PubMed Central journal article supplement — Eur Respir J. 2021 May 20;57(5):2003061. doi: 10.1183/13993003.03061-2020 (PMC8134811; doi:10.1183/13993003.03061-2020), 2021-05-20
Supplement: ERJ-03061-2020.Shareable.pdf [file ERJ-03061-2020.Shareable.pdf]

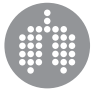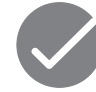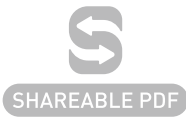

# Development and validation of a deep learning algorithm detecting 10 common abnormalities on chest radiographs

Ju Gang Nam<sup>1,2</sup>, Minchul Kim<sup>3</sup>, Jongchan Park<sup>3</sup>, Eui Jin Hwang<sup>1,2</sup>,  
Jong Hyuk Lee<sup>1,2</sup>, Jung Hee Hong<sup>1,2</sup>, Jin Mo Goo<sup>1,2,4</sup> and Chang Min Park<sup>1,2,4</sup>

**Affiliations:** <sup>1</sup>Dept of Radiology, Seoul National University Hospital, Seoul, Republic of Korea. <sup>2</sup>College of Medicine, Seoul National University, Seoul, Republic of Korea. <sup>3</sup>Lunit Inc., Seoul, Republic of Korea. <sup>4</sup>Institute of Radiation Medicine, Seoul National University Medical Research Center, Seoul, Republic of Korea.

**Correspondence:** Chang Min Park, Dept of Radiology and Institute of Radiation Medicine, Seoul National University College of Medicine, 101 Daehak-ro, Jongno-gu, Seoul 03080, Republic of Korea.  
E-mail: cmpark.morphius@gmail.com

 @ERSpublications

**A deep learning algorithm detecting 10 common abnormalities was trained with 146717 images and showed excellent performance on chest radiographs, helping radiologists improve their performance and advance the reporting time for critical or urgent cases** <https://bit.ly/3k8tZ5P>

**Cite this article as:** Nam JG, Kim M, Park J, *et al.* Development and validation of a deep learning algorithm detecting 10 common abnormalities on chest radiographs. *Eur Respir J* 2021; 57: 2003061 [<https://doi.org/10.1183/13993003.03061-2020>].

This single-page version can be shared freely online.

**ABSTRACT** We aimed to develop a deep learning algorithm detecting 10 common abnormalities (DLAD-10) on chest radiographs, and to evaluate its impact in diagnostic accuracy, timeliness of reporting and workflow efficacy.

DLAD-10 was trained with 146717 radiographs from 108053 patients using a ResNet34-based neural network with lesion-specific channels for 10 common radiological abnormalities (pneumothorax, mediastinal widening, pneumoperitoneum, nodule/mass, consolidation, pleural effusion, linear atelectasis, fibrosis, calcification and cardiomegaly). For external validation, the performance of DLAD-10 on a same-day computed tomography (CT)-confirmed dataset (normal:abnormal 53:147) and an open-source dataset (PadChest; normal:abnormal 339:334) was compared with that of three radiologists. Separate simulated reading tests were conducted on another dataset adjusted to real-world disease prevalence in the emergency department, consisting of four critical, 52 urgent and 146 nonurgent cases. Six radiologists participated in the simulated reading sessions with and without DLAD-10.

DLAD-10 exhibited area under the receiver operating characteristic curve values of 0.895–1.00 in the CT-confirmed dataset and 0.913–0.997 in the PadChest dataset. DLAD-10 correctly classified significantly more critical abnormalities (95.0% (57/60)) than pooled radiologists (84.4% (152/180);  $p=0.01$ ). In simulated reading tests for emergency department patients, pooled readers detected significantly more critical (70.8% (17/24) *versus* 29.2% (7/24);  $p=0.006$ ) and urgent (82.7% (258/312) *versus* 78.2% (244/312);  $p=0.04$ ) abnormalities when aided by DLAD-10. DLAD-10 assistance shortened the mean $\pm$ SD time-to-report critical and urgent radiographs (640.5 $\pm$ 466.3 *versus* 3371.0 $\pm$ 1352.5 s and 1840.3 $\pm$ 1141.1 *versus* 2127.1 $\pm$ 1468.2 s, respectively; all  $p<0.01$ ) and reduced the mean $\pm$ SD interpretation time (20.5 $\pm$ 22.8 *versus* 23.5 $\pm$ 23.7 s;  $p<0.001$ ).

DLAD-10 showed excellent performance, improving radiologists' performance and shortening the reporting time for critical and urgent cases.
