# Supplementary material for: Development and validation of a deep learning algorithm detecting 10 common abnormalities on chest radiographs
Source: PubMed Central journal article supplement — Eur Respir J. 2021 May 20;57(5):2003061. doi: 10.1183/13993003.03061-2020 (PMC8134811; doi:10.1183/13993003.03061-2020), 2021-05-20
Supplement: ERJ-03061-2020.SUPPLEMENT.pdf [file ERJ-03061-2020.SUPPLEMENT.pdf]

## Supplement

### Data curation

The chest radiographs (CRs) with normal or abnormal findings were initially collected and classified in terms of whether they had each of the 10 abnormalities based on radiology reports from routine clinical practice made at Seoul National University Hospital between March 2004 and December 2017. For data curation, all CRs were reviewed once again by at least one of 20 board-certified radiologists (labeling group; 7-14 years of experience in reading CRs). The data curation process was performed in two steps: image-level classification and pixel-level annotation. During the image-level classification, radiologists from the labeling group confirmed whether each CR was categorized correctly for each abnormality. Afterwards, during the pixel-level annotation, they annotated the exact location of each abnormal finding on the CR.

During the data curation process performed by the labeling group, CRs originally designated as normal that actually showed an abnormality and CRs initially classified as abnormal that did not have detectable abnormal findings were excluded from the dataset. Finally, 146,717 CRs (143,768 postero-anterior projection CRs and 2,949 antero-posterior projection CRs; 90,317 normal and 56,400 abnormal CRs) from 108,053 patients (55,394 men and 52,659 women; mean age,  $56.1 \pm 14.5$  years) were used as our development dataset. For each abnormality, 64.4-82.5% of the total dataset had an image-level label, and among the positively labeled images, 32.0-100% had a pixel-level annotation. Overall, 51.5% (29,018/56,400) abnormal CRs had a pixel-level annotation for at least one of the 10 abnormalities. Detailed numbers of the CRs with labeling or annotations for each abnormality are provided in Table E2.

## Algorithm development

We used a deep convolutional neural network with a ResNet-34 backbone [1] with pre-trained weights from ImageNet for DLAD-10. The final layer outputs 10 different abnormality-specific channels, each representing the probability for each abnormality. As the indeterminate features of convolutional neural network may result in limitation of receptive fields [2], we inserted an Attend-and-Compare module into the indeterminate layers to increase the detection performance [3]. For data augmentation, we used the combination method of standard ImageNet augmentation techniques [4] and AutoAugment [5], excluding the color-related operations. Additionally, conventional image processing techniques such as brightness and contrast adjustment, blurring, and random cropping were applied. DICOM raw pixel values were standardized into (0, 1) range and resized to have maximum 2,000 pixels for either height or width, without changing aspect ratio. DLAD-10 generates coarse probability maps with multiple channels, where each channel corresponds to each target abnormality. A weakly-supervised localization technique was used, in which the image-level probability scores were max-pooled from the output probability maps. When a ground truth image-level label was available, the loss was computed with image-level probability scores and the label. When a ground truth pixel-level annotation was available, the loss was computed with probability maps and annotation maps. Binary cross entropy was used for both procedures. Probability maps were used to localize possible regions representing the target abnormality. During the inference process, each CR was split into patches, and the network prediction of the image patches was aggregated to create a prediction result for the whole image. We used stochastic gradient descent as the optimizer, with a mini-batch size of 128. We applied a learning rate of 0.01 first, and then decreased it to 0.001 after 30 epochs. The models were trained up to 40 epochs.

1. He K, Zhang X, Ren S, Sun J. Deep residual learning for image recognition. In: Proceedings of the IEEE conference on computer vision and pattern recognition; 2016; 2016. p. 770-778.
2. Luo W, Li Y, Urtasun R, Zemel R. Understanding the effective receptive field in deep convolutional neural networks. In: Advances in neural information processing systems; 2016; 2016. p. 4898-4906.
3. Kim M, Park J, Na S, Park CM, Yoo D. Learning Visual Context by Comparison. *arXiv preprint arXiv:200707506* 2020.
4. Szegedy C, Vanhoucke V, Ioffe S, Shlens J, Wojna Z. Rethinking the inception architecture for computer vision. In: Proceedings of the IEEE conference on computer vision and pattern recognition; 2016; 2016. p. 2818-2826.
5. Cubuk ED, Zoph B, Mane D, Vasudevan V, Le QV. Autoaugment: Learning augmentation strategies from data. In: Proceedings of the IEEE conference on computer vision and pattern recognition; 2019; 2019. p. 113-123.

## Supplementary Figures and Figure Legends

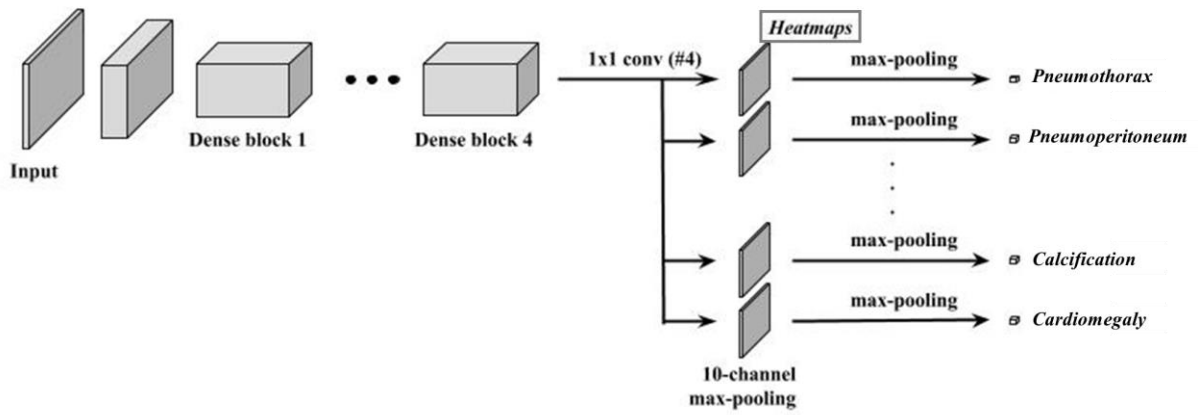

**Figure E1:** Architecture of the DLAD-10 algorithm.

## Study Scheme of the Simulation Test

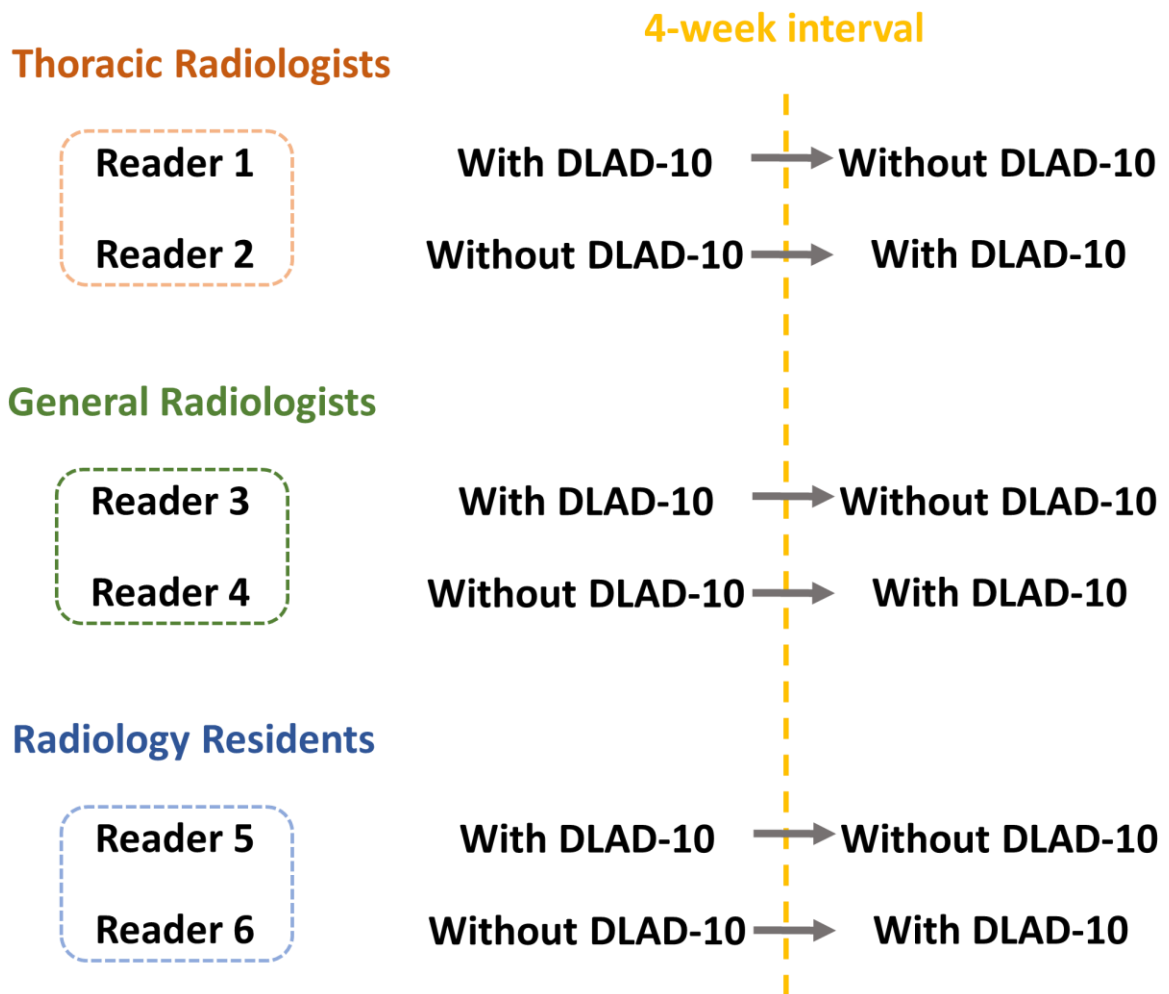

**Displayed DLAD-10 results on PACS  
worklist during simulated reading test**

**Abnormality type**

**Abnormality score (%)**

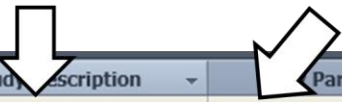

|      | Pri | Requ | Study description      | Part  | Conclusion | Repo |
|------|-----|------|------------------------|-------|------------|------|
| ▶ 28 |     |      | urgent: consolidation  | 94.46 |            | Wait |
| ▶ 29 |     |      | urgent: consolidation  | 95.79 |            | Wait |
| ▶ 30 |     |      | urgent: consolidation  | 19.5  |            | Wait |
| ▶ 31 |     |      | urgent: consolidation  | 95.92 |            | Wait |
| ▶ 32 |     |      | urgent: consolidation  | 17.29 |            | Wait |
| ▶ 33 |     |      | urgent: consolidation  | 98.07 |            | Wait |
| ▶ 34 |     |      | urgent: consolidation  | 88.83 |            | Wait |
| ▶ 35 |     |      | urgent: consolidation  | 49.82 |            | Wait |
| ▶ 36 |     |      | urgent: consolidation  | 19.91 |            | Wait |
| ▶ 37 |     |      | urgent: consolidation  | 94.52 |            | Wait |
| ▶ 38 |     |      | urgent: consolidation  | 98.21 |            | Wait |
| ▶ 39 |     |      | urgent: consolidation  | 76.93 |            | Wait |
| ▶ 40 |     |      | urgent: consolidation  | 88.32 |            | Wait |
| ▶ 41 |     |      | urgent: consolidation  | 95.54 |            | Wait |
| ▶ 42 |     |      | urgent: consolidation  | 49.54 |            | Wait |
| ▶ 43 |     |      | urgent: consolidation  | 98.72 |            | Wait |
| ▶ 44 |     |      | urgent: consolidation  | 97.53 |            | Wait |
| ▶ 45 |     |      | urgent: consolidation  | 98.82 |            | Wait |
| ▶ 46 |     |      | critical: pneumothorax | 96.88 |            | Wait |
| ▶ 47 |     |      | critical: pneumothorax | 39.49 |            | Wait |
| ▶ 48 |     |      | critical: pneumothorax | 93.98 |            | Wait |

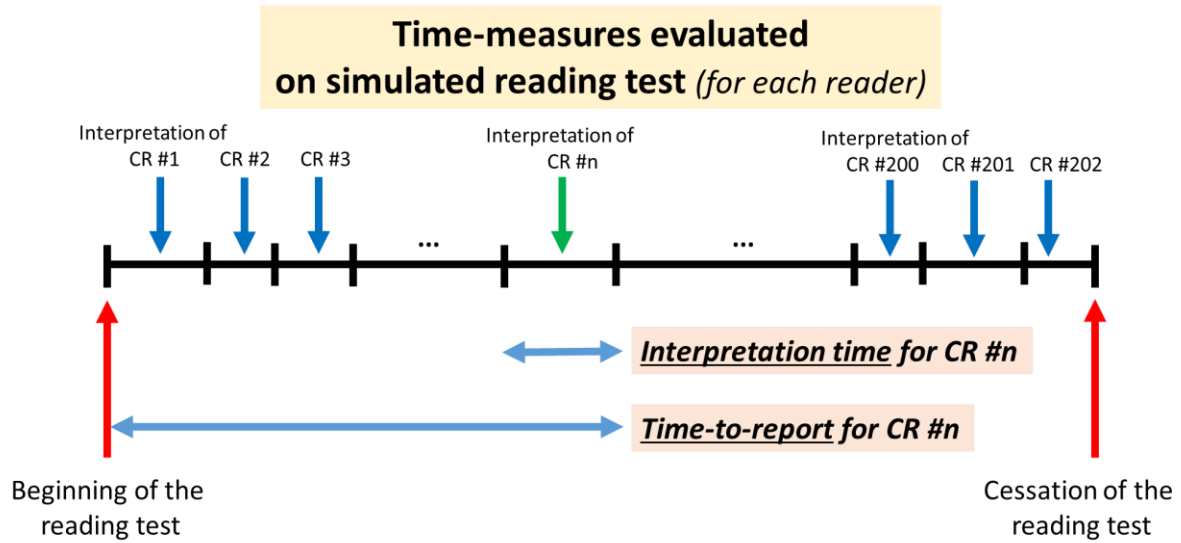

**Figure E2:** Details of the simulated reading test for emergency department visit patients. (A) Six readers, including two thoracic radiologists, two general radiologists, and two radiology residents performed the simulation test with DLAD-10 (the DLAD-10-aided reading session) and without DLAD-10 (the conventional reading session) at a 4-week interval. Three radiologists conducted the DLAD-10-aided reading session first, while the others performed the conventional reading session first. (B) In the DLAD-10-aided reading session, a list of the radiographs were displayed with abnormality types, urgency, and scores on the worklist. The readers were able to rearrange the order of the radiographs according to those findings. In the DLAD-10-aided reading session, each case was shown as a set of two images: an original image followed by a localized map of abnormalities from DLAD-10. (C) During each session, the time taken for the interpretation of each radiograph by each reader was recorded on the PACS. From these recordings, interpretation time taken for each radiograph and the time taken from the start of the reading session to the interpretation of each radiograph (time-to-report) were calculated.

*DLAD-10* = deep learning-based abnormality detection algorithm

**Table E1. Manufacturer and technique-related information for the chest radiographs**

| <b>Manufacturer</b> |                 | <b>Manufacture model name</b> | <b>Technique</b> | <b>Development dataset</b> | <b>Internal validation dataset</b> | <b>External validation dataset*</b> | <b>Simulated reading test dataset</b> |
|---------------------|-----------------|-------------------------------|------------------|----------------------------|------------------------------------|-------------------------------------|---------------------------------------|
| Philips Healthcare  | The Netherlands | VS, VT etc.                   | DR               | 68,963                     | 1,301                              | 117                                 |                                       |
| FUJIFILM            | Japan           | 5000, VELOCITY-T              | DR               | 5,924                      | 265                                |                                     |                                       |
| GE Healthcare       | USA             | Global 1 Platform             | DR               | 13,447                     | 291                                | 3                                   |                                       |
| Canon               | Japan           | CXDI, CN                      | DR               | 4,329                      | 165                                |                                     |                                       |
| Siemens             | USA             | Fluorospot Compact FD         | DR               | 12,341                     | 221                                | 58                                  | 176                                   |
| Samsung             | Korea           | DGR-C22M2A/KR                 | DR               | 860                        | 18                                 | 9                                   |                                       |
| DongKang            | Korea           | INNOVISION                    | DR               | 4,260                      | 14                                 |                                     |                                       |



|            |       |                    |    |         |       |     |     |
|------------|-------|--------------------|----|---------|-------|-----|-----|
| Konica     | Japan | CS-7               | DR | 552     | 49    |     |     |
| Carestream | USA   | DRX-<br>Revolution | DR | 4,761   | 198   | 3   | 26  |
| Listem     | Korea | DRS                | DR | 109     | 1     |     |     |
| Unknown    |       |                    | DR | 31,171  |       |     |     |
| Total      |       |                    |    | 146,717 | 2,523 | 190 | 202 |

\*This dataset refers to the SNUH dataset used for external validation.

*DR* = digital radiography

**Table E2. Development dataset information**

|                       | <b>Pneumo<br/>thorax</b> | <b>Pneumop<br/>eritoneum</b> | <b>Mediastinal<br/>widening</b> | <b>Nodule</b> | <b>Consoli<br/>dation</b> | <b>Pleural<br/>effusion</b> | <b>Atelectasis</b> | <b>Fibrosis</b> | <b>Calcificati<br/>on</b> | <b>Cardio<br/>megaly</b> | <b>Abnormal</b> |
|-----------------------|--------------------------|------------------------------|---------------------------------|---------------|---------------------------|-----------------------------|--------------------|-----------------|---------------------------|--------------------------|-----------------|
| <b>Negative label</b> | 112,008                  | 92,194                       | 93,583                          | 102,731       | 87,940                    | 109,947                     | 90,662             | 91,375          | 91,691                    | 91,015                   | 90,317          |
| <b>Positive label</b> | 7,254                    | 4,936                        | 471                             | 12,408        | 13,004                    | 11,089                      | 10,559             | 3,856           | 2,840                     | 3,399                    | 56,400          |
| <b>Annotation +</b>   | 4,324                    | 1,860                        | 471                             | 6,029         | 11,282                    | 5,972                       | 3,378              | 3,506           | 2,455                     | 2,421                    | 29,018          |
| <b>Annotation -</b>   | 2,930                    | 3,076                        | 0                               | 6,379         | 1,722                     | 5,117                       | 7,181              | 350             | 385                       | 978                      | 27,382          |
| <b>Not labeled</b>    | 27,455                   | 49,587                       | 52,663                          | 31,578        | 45,773                    | 25,681                      | 45,496             | 51,486          | 52,186                    | 52303                    | 0               |
| <b>Total</b>          | 146,717                  | 146,717                      | 146,717                         | 146,717       | 146,717<br>7              | 146,717                     | 146,717            | 146,717         | 146,717                   | 146,717                  | 146,717         |

**Table E3. Details of the internal and external validation datasets**

|                                 | <b>Internal<br/>validation dataset</b> | <b>SNUH dataset</b>                                                          | <b>PadChest open<br/>dataset</b> |
|---------------------------------|----------------------------------------|------------------------------------------------------------------------------|----------------------------------|
| <b>Total CRs</b>                |                                        | <b>190</b>                                                                   | <b>673</b>                       |
| <b>Reference standard</b>       | Radiologists<br>(labeling group)       | Cardiothoracic ratio on<br>CR (for<br>cardiomegaly),<br>Same-day CT (others) | Radiologists<br>(labeling group) |
| <b>Projection</b>               | PA: 2,311<br>AP: 212                   | PA: 169<br>AP: 21                                                            | all PA                           |
| <b>Pneumothorax</b>             | 384                                    | 23                                                                           | 11                               |
| <b>Pneumoperitoneum</b>         | 152                                    | 19                                                                           | 24                               |
| <b>Mediastinal<br/>widening</b> | 86                                     | 18                                                                           | 4                                |
| <b>Nodule</b>                   | 507                                    | 23                                                                           | 32                               |
| <b>Consolidation</b>            | 414                                    | 34                                                                           | 119                              |
| <b>Pleural effusion</b>         | 164                                    | 37                                                                           | 54                               |
| <b>Atelectasis</b>              | 208                                    | 28                                                                           | 58                               |
| <b>Fibrosis</b>                 | 218                                    | 19                                                                           | 29                               |
| <b>Calcification</b>            | 208                                    | 21                                                                           | 36                               |
| <b>Cardiomegaly</b>             | 215                                    | 18                                                                           | 90                               |
| <b>Normal</b>                   | 747                                    | 55                                                                           | 334                              |

Cardiomegaly was only evaluated on postero-anterior images.

CR = chest radiograph, PA = postero-anterior, AP = antero-posterior

**Table E4. Details of the dataset used for the simulated reading test for emergency department patients**

|                                  | <b>Number</b> | <b>Other information</b>                                                                   |
|----------------------------------|---------------|--------------------------------------------------------------------------------------------|
| <b>Total</b>                     | 202           | <b>Manufacturer</b>                                                                        |
| <b>Postero-anterior</b>          | 176           | Fluorospot Compact FD (Siemens, USA)                                                       |
| <b>Antero-posterior</b>          | 26            | DXR-Revolution (Carestream, USA)                                                           |
| <b>Disease entity</b>            |               | <b>Reference standards</b>                                                                 |
| <b>Critical</b>                  | 4             |                                                                                            |
| <b>Pneumothorax</b>              | 2             | Same-day CT scan                                                                           |
| <b>Pneumomediastinum</b>         | 1             | Same-day CT scan                                                                           |
| <b>Acute aortic syndrome</b>     | 1             | Same-day CT scan: aortic dissection                                                        |
| <b>Urgent</b>                    | 52            |                                                                                            |
| <b>Pneumonia</b>                 | 20            | Same-day CT scan                                                                           |
| <b>Pulmonary edema</b>           | 6             | Same-day CT + clinically supported                                                         |
| <b>Active tuberculosis</b>       | 4             | Same-day CT scan + PCR-confirmed                                                           |
| <b>Interstitial lung disease</b> | 3             | Same-day CT scan: UIP pattern                                                              |
| <b>Lung nodule</b>               | 10            | Same-day CT scan, confirmed to be lung cancer (n=5), metastasis (n=4), and granuloma (n=1) |
| <b>Isolated pleural effusion</b> | 7             | Same-day CT scan                                                                           |
| <b>Mediastinal mass</b>          | 1             | Same-day CT scan, confirmed thymic epithelial tumor                                        |
| <b>Rib fracture</b>              | 1             | Same-day CT scan                                                                           |
| <b>Non-urgent/normal</b>         | 146           | Same-day CT scan                                                                           |

*CT* = computed tomography, *PCR* = polymerase chain reaction, *UIP* = usual interstitial pneumonia

Table E5. Detailed results from the simulated reading test: urgency categorization

| Performance of DLAD-10       |                              |        |          |          |  |                               |        |          |          |
|------------------------------|------------------------------|--------|----------|----------|--|-------------------------------|--------|----------|----------|
|                              | Non-urgent                   | Urgent | Critical | Accuracy |  |                               |        |          |          |
| <b>Critical</b>              | 0                            | 0      | 4        | 100%     |  |                               |        |          |          |
| Pneumothorax                 | 0                            | 0      | 2        | 100%     |  |                               |        |          |          |
| Pneumoperitoneum             | 0                            | 0      | 1        | 100%     |  |                               |        |          |          |
| Aortic dissection            | 0                            | 0      | 1        | 100%     |  |                               |        |          |          |
| <b>Urgent</b>                | 5                            | 34     | 13       | 65.4%    |  |                               |        |          |          |
| Pneumonia                    | 2                            | 10     | 8        | 50.0%    |  |                               |        |          |          |
| Pulmonary edema              | 0                            | 4      | 2        | 66.7%    |  |                               |        |          |          |
| Active tuberculosis          | 0                            | 4      | 0        | 100%     |  |                               |        |          |          |
| ILD                          | 0                            | 2      | 1        | 66.7%    |  |                               |        |          |          |
| Nodule                       | 1                            | 8      | 1        | 80.0%    |  |                               |        |          |          |
| Pleural effusion             | 1                            | 6      | 0        | 85.7%    |  |                               |        |          |          |
| Mediastinal mass             | 0                            | 0      | 1        | 0.0%     |  |                               |        |          |          |
| Rib fracture                 | 1                            | 0      | 0        | 0.0%     |  |                               |        |          |          |
| <b>Non-urgent/normal</b>     | 130                          | 7      | 9        | 89.0%    |  |                               |        |          |          |
|                              |                              |        |          |          |  |                               |        |          |          |
|                              | Conventional reading session |        |          |          |  | DLAD-10-aided reading session |        |          |          |
| Pooled readers (readers 1-6) |                              |        |          |          |  |                               |        |          |          |
|                              | Non-urgent                   | Urgent | Critical | Accuracy |  | Non-urgent                    | Urgent | Critical | Accuracy |
| <b>Critical</b>              | 13                           | 4      | 7        | 29.2%    |  | 6                             | 1      | 17       | 70.8%    |
| Pneumothorax                 | 3                            | 2      | 7        | 58.3%    |  | 1                             | 1      | 10       | 83.3%    |
| Pneumoperitoneum             | 6                            | 0      | 0        | 0.0%     |  | 0                             | 0      | 6        | 100.0%   |
| Aortic dissection            | 4                            | 2      | 0        | 0.0%     |  | 5                             | 0      | 1        | 16.7%    |
| <b>Urgent</b>                | 68                           | 244    | 0        | 78.2%    |  | 49                            | 260    | 3        | 83.3%    |
| Pneumonia                    | 24                           | 96     | 0        | 80.0%    |  | 23                            | 94     | 3        | 78.3%    |
| Pulmonary edema              | 1                            | 35     | 0        | 97.2%    |  | 1                             | 35     | 0        | 97.2%    |
| Active tuberculosis          | 8                            | 16     | 0        | 66.7%    |  | 3                             | 21     | 0        | 87.5%    |
| ILD                          | 0                            | 18     | 0        | 100.0%   |  | 0                             | 18     | 0        | 100.0%   |
| Nodule                       | 18                           | 42     | 0        | 70.0%    |  | 9                             | 51     | 0        | 85.0%    |

|                                                |                   |               |                 |                 |  |                   |               |                 |                 |
|------------------------------------------------|-------------------|---------------|-----------------|-----------------|--|-------------------|---------------|-----------------|-----------------|
| <b>Pleural effusion</b>                        | 7                 | 35            | 0               | 83.3%           |  | 6                 | 36            | 0               | 85.7%           |
| <b>Mediastinal mass</b>                        | 4                 | 2             | 0               | 33.3%           |  | 1                 | 5             | 0               | 83.3%           |
| <b>Rib fracture</b>                            | 6                 | 0             | 0               | 0.0%            |  | 6                 | 0             | 0               | 0.0%            |
| <b>Non-urgent/normal</b>                       | 801               | 72            | 3               | 91.4%           |  | 817               | 59            | 0               | 93.3%           |
| <b>Thoracic radiologists (readers 1 and 2)</b> |                   |               |                 |                 |  |                   |               |                 |                 |
|                                                | <b>Non-urgent</b> | <b>Urgent</b> | <b>Critical</b> | <b>Accuracy</b> |  | <b>Non-urgent</b> | <b>Urgent</b> | <b>Critical</b> | <b>Accuracy</b> |
| <b>Critical</b>                                | 3                 | 1             | 4               | 50.0%           |  | 2                 | 0             | 6               | 75.0%           |
| <b>Pneumothorax</b>                            | 0                 | 0             | 4               | 100.0%          |  | 0                 | 0             | 4               | 100.0%          |
| <b>Pneumoperitoneum</b>                        | 2                 | 0             | 0               | 0.0%            |  | 0                 | 0             | 2               | 100.0%          |
| <b>Aortic dissection</b>                       | 1                 | 1             | 0               | 0.0%            |  | 2                 | 0             | 0               | 0.0%            |
| <b>Urgent</b>                                  | 16                | 88            | 0               | 84.6%           |  | 14                | 90            | 0               | 86.5%           |
| <b>Pneumonia</b>                               | 5                 | 35            | 0               | 87.5%           |  | 6                 | 34            | 0               | 85.0%           |
| <b>Pulmonary edema</b>                         | 0                 | 12            | 0               | 100.0%          |  | 0                 | 12            | 0               | 100.0%          |
| <b>Active tuberculosis</b>                     | 2                 | 6             | 0               | 75.0%           |  | 1                 | 7             | 0               | 87.5%           |
| <b>ILD</b>                                     | 0                 | 6             | 0               | 100.0%          |  | 0                 | 6             | 0               | 100.0%          |
| <b>Nodule</b>                                  | 3                 | 17            | 0               | 85.0%           |  | 2                 | 18            | 0               | 90.0%           |
| <b>Pleural effusion</b>                        | 2                 | 12            | 0               | 85.7%           |  | 2                 | 12            | 0               | 85.7%           |
| <b>Mediastinal mass</b>                        | 2                 | 0             | 0               | 0.0%            |  | 1                 | 1             | 0               | 50.0%           |
| <b>Rib fracture</b>                            | 2                 | 0             | 0               | 0.0%            |  | 2                 | 0             | 0               | 0.0%            |
| <b>Non-urgent/normal</b>                       | 258               | 31            | 3               | 88.4%           |  | 268               | 24            | 0               | 91.8%           |
| <b>General radiologists (readers 3 and 4)</b>  |                   |               |                 |                 |  |                   |               |                 |                 |
|                                                | <b>Non-urgent</b> | <b>Urgent</b> | <b>Critical</b> | <b>Accuracy</b> |  | <b>Non-urgent</b> | <b>Urgent</b> | <b>Critical</b> | <b>Accuracy</b> |
| <b>Critical</b>                                | 5                 | 1             | 2               | 25.0%           |  | 2                 | 1             | 5               | 62.5%           |
| <b>Pneumothorax</b>                            | 1                 | 1             | 2               | 50.0%           |  | 1                 | 1             | 2               | 50.0%           |
| <b>Pneumoperitoneum</b>                        | 2                 | 0             | 0               | 0.0%            |  | 0                 | 0             | 2               | 100.0%          |
| <b>Aortic dissection</b>                       | 2                 | 0             | 0               | 0.0%            |  | 1                 | 0             | 1               | 50.0%           |
| <b>Urgent</b>                                  | 36                | 68            | 0               | 65.4%           |  | 23                | 79            | 2               | 76.0%           |
| <b>Pneumonia</b>                               | 12                | 28            | 0               | 70.0%           |  | 10                | 28            | 2               | 70.0%           |
| <b>Pulmonary edema</b>                         | 1                 | 11            | 0               | 91.7%           |  | 1                 | 11            | 0               | 91.7%           |
| <b>Active tuberculosis</b>                     | 4                 | 4             | 0               | 50.0%           |  | 2                 | 6             | 0               | 75.0%           |

|                                              |                   |               |                 |                 |  |                   |               |                 |                 |
|----------------------------------------------|-------------------|---------------|-----------------|-----------------|--|-------------------|---------------|-----------------|-----------------|
| <b>ILD</b>                                   | 0                 | 6             | 0               | 100.0%          |  | 0                 | 6             | 0               | 100.0%          |
| <b>Nodule</b>                                | 12                | 8             | 0               | 40.0%           |  | 6                 | 14            | 0               | 70.0%           |
| <b>Pleural effusion</b>                      | 3                 | 11            | 0               | 78.6%           |  | 2                 | 12            | 0               | 85.7%           |
| <b>Mediastinal mass</b>                      | 2                 | 0             | 0               | 0.0%            |  | 0                 | 2             | 0               | 100.0%          |
| <b>Rib fracture</b>                          | 2                 | 0             | 0               | 0.0%            |  | 2                 | 0             | 0               | 0.0%            |
| <b>Non-urgent/normal</b>                     | 282               | 10            | 0               | 96.6%           |  | 281               | 11            | 0               | 96.2%           |
| <b>Radiology residents (readers 5 and 6)</b> |                   |               |                 |                 |  |                   |               |                 |                 |
|                                              | <b>Non-urgent</b> | <b>Urgent</b> | <b>Critical</b> | <b>Accuracy</b> |  | <b>Non-urgent</b> | <b>Urgent</b> | <b>Critical</b> | <b>Accuracy</b> |
| <b>Critical</b>                              | 5                 | 2             | 1               | 12.5%           |  | 2                 | 0             | 6               | 75.0%           |
| <b>Pneumothorax</b>                          | 2                 | 1             | 1               | 25.0%           |  | 0                 | 0             | 4               | 100.0%          |
| <b>Pneumoperitoneum</b>                      | 2                 | 0             | 0               | 0.0%            |  | 0                 | 0             | 2               | 100.0%          |
| <b>Aortic dissection</b>                     | 1                 | 1             | 0               | 0.0%            |  | 2                 | 0             | 0               | 0.0%            |
| <b>Urgent</b>                                | 16                | 88            | 0               | 84.6%           |  | 13                | 89            | 2               | 85.6%           |
| <b>Pneumonia</b>                             | 7                 | 33            | 0               | 82.5%           |  | 6                 | 32            | 2               | 80.0%           |
| <b>Pulmonary edema</b>                       | 0                 | 12            | 0               | 100.0%          |  | 0                 | 12            | 0               | 100.0%          |
| <b>Active tuberculosis</b>                   | 2                 | 6             | 0               | 75.0%           |  | 0                 | 8             | 0               | 100.0%          |
| <b>ILD</b>                                   | 0                 | 6             | 0               | 100.0%          |  | 0                 | 6             | 0               | 100.0%          |
| <b>Nodule</b>                                | 3                 | 17            | 0               | 85.0%           |  | 3                 | 17            | 0               | 95.0%           |
| <b>Pleural effusion</b>                      | 2                 | 12            | 0               | 85.7%           |  | 2                 | 12            | 0               | 85.7%           |
| <b>Mediastinal mass</b>                      | 0                 | 2             | 0               | 100.0%          |  | 0                 | 2             | 0               | 100.0%          |
| <b>Rib fracture</b>                          | 2                 | 0             | 0               | 0.0%            |  | 2                 | 0             | 0               | 0.0%            |
| <b>Non-urgent/normal</b>                     | 261               | 31            | 0               | 89.4%           |  | 273               | 19            | 0               | 93.5%           |

*ED* = emergency department, *DLAD-10* = deep learning-based abnormality detection algorithm, *ILD* = interstitial lung disease



**Table E6. Analysis of interpretation time in the simulated reading test for emergency department patients**

|                              |                      | <b>Non-urgent</b><br>(n=146)  | <b>Urgent</b><br>(n=52)      | <b>Critical</b><br>(n=4) | <b>Total</b><br>(n=202)       |
|------------------------------|----------------------|-------------------------------|------------------------------|--------------------------|-------------------------------|
| <b>Thoracic radiologists</b> |                      |                               |                              |                          |                               |
| <b>Reader 1</b>              | <b>Conventional</b>  | 21.8 ± 24.7<br>(6-203)        | 48.8 ± 30.3<br>(8-129)       | 24.0 ± 16.1<br>(5-44)    | 28.8 ± 28.6<br>(5-203)        |
|                              | <b>DLAD-10-aided</b> | 19.6 ± 20.4<br>(4-127)        | 52.7 ± 31.1<br>(5-138)       | 42.5 ± 30.7<br>(6-81)    | 28.6 ± 27.8<br>(4-138)        |
|                              | <b>*P-values</b>     | .40                           | .40                          | .43                      | .94                           |
| <b>Reader 2</b>              | <b>Conventional</b>  | 25.8 ± 16.7<br>(9-90)         | 52.7 ± 46.3<br>(12-344)      | 30.3 ± 24.6<br>(15-67)   | 32.8 ± 29.9<br>(9-344)        |
|                              | <b>DLAD-10-aided</b> | <u>21.2 ± 21.3</u><br>(6-147) | 45.9 ± 29.1<br>(9-161)       | 33.0 ± 25.1<br>(13-69)   | <u>27.8 ± 25.9</u><br>(6-161) |
|                              | <b>*P-values</b>     | .03                           | .29                          | .61                      | .02                           |
| <b>General radiologists</b>  |                      |                               |                              |                          |                               |
| <b>Reader 3</b>              | <b>Conventional</b>  | 14.4 ± 10.9<br>(7-78)         | <u>29.1 ± 15.4</u><br>(8-80) | 27.3 ± 5.9<br>(21-35)    | 18.5 ± 13.7<br>(7-80)         |
|                              | <b>DLAD-10-aided</b> | 11.8 ± 15.8<br>(2-102)        | 46.5 ± 29.3<br>(3-134)       | 53.0 ± 41.1<br>(23-113)  | 21.5 ± 25.9<br>(2-134)        |
|                              | <b>*P-values</b>     | .07                           | <.001                        | .31                      | .06                           |
| <b>Reader 4</b>              | <b>Conventional</b>  | 10.8 ± 7.5<br>(4-58)          | 34.8 ± 23.9<br>(7-107)       | 16.3 ± 16.1<br>(6-40)    | 17.1 ± 13.3<br>(4-107)        |

|                                          |                      |                              |                              |                        |                              |
|------------------------------------------|----------------------|------------------------------|------------------------------|------------------------|------------------------------|
|                                          | <b>DLAD-10-aided</b> | <u>6.8 ± 7.2</u><br>(1-47)   | <u>23.4 ± 13.6</u><br>(3-68) | 30.0 ± 9.1<br>(19-40)  | <u>11.5 ± 12.0</u><br>(1-68) |
|                                          | <b>*P-values</b>     | <.001                        | .001                         | .18                    | <.001                        |
| <b>Radiology residents</b>               |                      |                              |                              |                        |                              |
| <b>Reader 5</b>                          | <b>Conventional</b>  | 15.5 ± 10.0<br>(6-52)        | 27.4 ± 29.8<br>(8-220)       | 20.5 ± 14.9<br>(8-42)  | 18.6 ± 18.1<br>(6-220)       |
|                                          | <b>DLAD-10-aided</b> | 14.0 ± 14.0<br>(4-65)        | 26.9 ± 16.3<br>(4-94)        | 25.0 ± 7.8<br>(16-35)  | 16.9 ± 14.0<br>(4-94)        |
|                                          | <b>*P-values</b>     | .06                          | .89                          | .71                    | .21                          |
| <b>Reader 6</b>                          | <b>Conventional</b>  | 19.1 ± 17.5<br>(7-129)       | 43.0 ± 35.45<br>(8-198)      | 19.5 ± 13.9<br>(9-40)  | 25.3 ± 25.5<br>(1-198)       |
|                                          | <b>DLAD-10-aided</b> | <u>8.32 ± 13.1</u><br>(2-74) | 39.3 ± 23.6<br>(2-97)        | 36.5 ± 22.3<br>(16-68) | <u>16.9 ± 21.5</u><br>(2-97) |
|                                          | <b>*P-values</b>     | <.001                        | .38                          | .07                    | <.001                        |
| <b>Pooled radiologists (readers 1-6)</b> |                      |                              |                              |                        |                              |
|                                          | <b>Conventional</b>  | 17.9 ± 16.4                  | 39.3 ± 32.8                  | <u>23.0 ± 15.2</u>     | 23.5 ± 23.7                  |
|                                          | <b>DLAD-10-aided</b> | <u>13.5 ± 16.5</u>           | 39.1 ± 26.8                  | 36.7 ± 24.4            | <u>20.5 ± 22.8</u>           |
|                                          | <b>*P-values</b>     | <.001                        | .92                          | .01                    | <.001                        |

Data are presented as average ± SD time [sec] (range) taken to interpret each CR. Significant differences in the interpretation time between the conventional and DLAD-10-aided reading sessions according to the paired t-test are underlined.

\*P values were calculated from the paired t-test

*DLAD-10* = deep learning-based abnormality detection algorithm
